# Supplementary material for: Effect of Irrigation Regime and Soil Nutrients on the Growth of the Paddy Weed Heteranthera reniformis and Rice Grain Yield
Source: MDPI journal article supplement (doi:10.3390/environments11030056), 2024-03-14
Supplement: s1 [file s1]

1 **Effect of Irrigation Regime and Soil Nutrients on the Growth of the Paddy Weed**  
2 ***Heteranthera reniformis* and Rice Grain Yield**

3 Srijana Thapa Magar <sup>1</sup>, Takeshi Fujino<sup>1,\*</sup>, Thant Ko Ko Han<sup>1</sup>

4

5 <sup>1</sup> Department of Environmental Science and Technology, Graduate School of Science and  
6 Engineering, Saitama University, 255 Shimo-okubo, Saitama-city, Saitama 338-8570, Japan  
7 Supplementary Materials

8 \* Corresponding author

9 Email address: fujino@mail.saitama-u.ac.jp

10

11 **Supplementary Material**

12

13 **List of Supplementary Material**

14

15

16 **Table S1** Mean height of rice during growth (monthly).

17

18 **Table S2** Mean number of tillers observed during growth (monthly).

19

20 **Table S1.** Mean height of rice during growth (monthly).

| <b>Irrigation(IR)</b> | <b>Nutrient(NT)</b> | <b>30DAT</b>               | <b>60DAT</b>              | <b>90DAT</b>            |
|-----------------------|---------------------|----------------------------|---------------------------|-------------------------|
| <b>CI</b>             |                     |                            |                           |                         |
|                       | NT <sub>0</sub>     | 63.67±1.89 <sup>de</sup>   | 90.67±0.94 <sup>a</sup>   | 94.43±1.76 <sup>a</sup> |
|                       | NT <sub>1</sub>     | 64±2.94 <sup>de</sup>      | 90.33±0.47 <sup>a</sup>   | 94.63±0.49 <sup>a</sup> |
|                       | NT <sub>2</sub>     | 67±2.83 <sup>cde</sup>     | 94.33±0.94 <sup>a</sup>   | 99.47±3.51 <sup>a</sup> |
| <b>S</b>              |                     |                            |                           |                         |
|                       | NT <sub>0</sub>     | 77.67±5.44 <sup>abc</sup>  | 82.33±1.7 <sup>bcd</sup>  | 97.93±2.52 <sup>a</sup> |
|                       | NT <sub>1</sub>     | 80±7.07 <sup>ab</sup>      | 84.67±1.25 <sup>bc</sup>  | 98.33±1.75 <sup>a</sup> |
|                       | NT <sub>2</sub>     | 81.33±1.25 <sup>a</sup>    | 85±0.82 <sup>b</sup>      | 102.2±2.73 <sup>a</sup> |
| <b>25P</b>            |                     |                            |                           |                         |
|                       | NT <sub>0</sub>     | 66.67±2.49 <sup>cde</sup>  | 80.33±1.25 <sup>d</sup>   | 94.33±3.3 <sup>a</sup>  |
|                       | NT <sub>1</sub>     | 68±3.56 <sup>bcde</sup>    | 80.67±0.47 <sup>cd</sup>  | 96.37±0.58 <sup>a</sup> |
|                       | NT <sub>2</sub>     | 67.33±2.06 <sup>cde</sup>  | 84.67±1.7 <sup>bc</sup>   | 94.57±2.53 <sup>a</sup> |
| <b>35P</b>            |                     |                            |                           |                         |
|                       | NT <sub>0</sub>     | 68.33±1.25 <sup>bcde</sup> | 81.1±1.41 <sup>bcd</sup>  | 91.6±3.37 <sup>a</sup>  |
|                       | NT <sub>1</sub>     | 61.33±1.25 <sup>e</sup>    | 82.03±1.41 <sup>bcd</sup> | 93±1.96 <sup>a</sup>    |
|                       | NT <sub>2</sub>     | 75.67±3.68 <sup>abcd</sup> | 84±0.82 <sup>bcd</sup>    | 97.5±7.72 <sup>a</sup>  |
| <b>f-value</b>        |                     |                            |                           |                         |
|                       | IR                  | 21.95***                   | 93***                     | 3.2*                    |
|                       | NT                  | 3.95*                      | 18.52***                  | 3.07ns                  |
|                       | IR×NT               | 2ns                        | 1.2ns                     | .5ns                    |

21 Values are means ± standard error. According to the Tukey test, different lowercase letters  
 22 within a column indicate that means are significantly different (p < 0.05) among all individual  
 23 treatments. ns - not significant, \* p < 0.05, and \*\*\*p < 0.001 in two-way ANOVA.

24

25

26 **Table S2.** Mean number of tillers observed during growth (monthly).

| <b>Irrigation(IR)</b> | <b>Nutrients(NT)</b> | <b>30DAT</b>       | <b>60DAT</b>         | <b>90DAT</b>         |
|-----------------------|----------------------|--------------------|----------------------|----------------------|
| <b>CI</b>             |                      |                    |                      |                      |
|                       | NT <sub>0</sub>      | 8.67 <sup>ab</sup> | 9.67 <sup>abcd</sup> | 10.33 <sup>abc</sup> |
|                       | NT <sub>1</sub>      | 8 <sup>ab</sup>    | 11.33 <sup>ab</sup>  | 11.33 <sup>ab</sup>  |
|                       | NT <sub>2</sub>      | 9.67 <sup>a</sup>  | 10.67 <sup>abc</sup> | 12 <sup>ab</sup>     |
| <b>S</b>              |                      |                    |                      |                      |
|                       | NT <sub>0</sub>      | 4.67 <sup>b</sup>  | 7.67 <sup>cd</sup>   | 9 <sup>bc</sup>      |
|                       | NT <sub>1</sub>      | 8 <sup>ab</sup>    | 8.33 <sup>bcd</sup>  | 9.33 <sup>bc</sup>   |
|                       | NT <sub>2</sub>      | 8.33 <sup>ab</sup> | 10.67 <sup>abc</sup> | 11.67 <sup>ab</sup>  |
| <b>25P</b>            |                      |                    |                      |                      |
|                       | NT <sub>0</sub>      | 5 <sup>b</sup>     | 9.33 <sup>bcd</sup>  | 9.33 <sup>bc</sup>   |
|                       | NT <sub>1</sub>      | 7.67 <sup>ab</sup> | 9.67 <sup>abcd</sup> | 10 <sup>abc</sup>    |
|                       | NT <sub>2</sub>      | 7.33 <sup>ab</sup> | 10 <sup>abcd</sup>   | 11 <sup>ab</sup>     |
| <b>35P</b>            |                      |                    |                      |                      |
|                       | NT <sub>0</sub>      | 5.33 <sup>b</sup>  | 7 <sup>d</sup>       | 7.67 <sup>c</sup>    |
|                       | NT <sub>1</sub>      | 6.67 <sup>ab</sup> | 10 <sup>abcd</sup>   | 10.33 <sup>abc</sup> |
|                       | NT <sub>2</sub>      | 7.67 <sup>ab</sup> | 12.67 <sup>a</sup>   | 13 <sup>a</sup>      |
| <b>f-value</b>        |                      |                    |                      |                      |
|                       | IR                   | 4.83**             | 3.92*                | 2.49ns               |
|                       | NT                   | 8.66**             | 18.53***             | 21.9***              |
|                       | IR×NT                | 1.26ns             | 4.28**               | 2.26ns               |

27 According to the Tukey test, different lowercase letters within a column indicate that means are  
28 significantly different ( $P < 0.05$ ) among all individual treatments. ns -not significant, \*  $p < 0.05$ ,  
29 \*\* $p < 0.01$ , and \*\*\* $p < 0.001$  in two-way ANOVA.
